# Supplementary material for: MiR-200c-3p maintains stemness and proliferative potential in adipose-derived stem cells by counteracting senescence mechanisms
Source: PubMed Central journal article supplement (PMC8448302; doi:10.1371/journal.pone.0257070), 2021-09-17

Figure 2

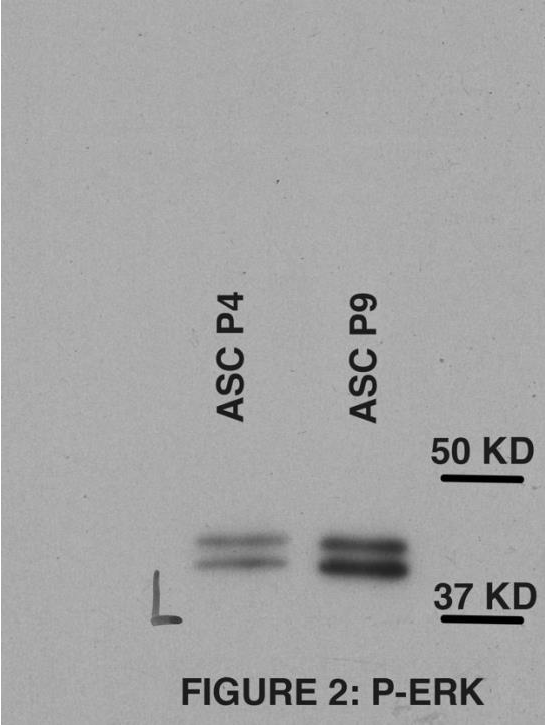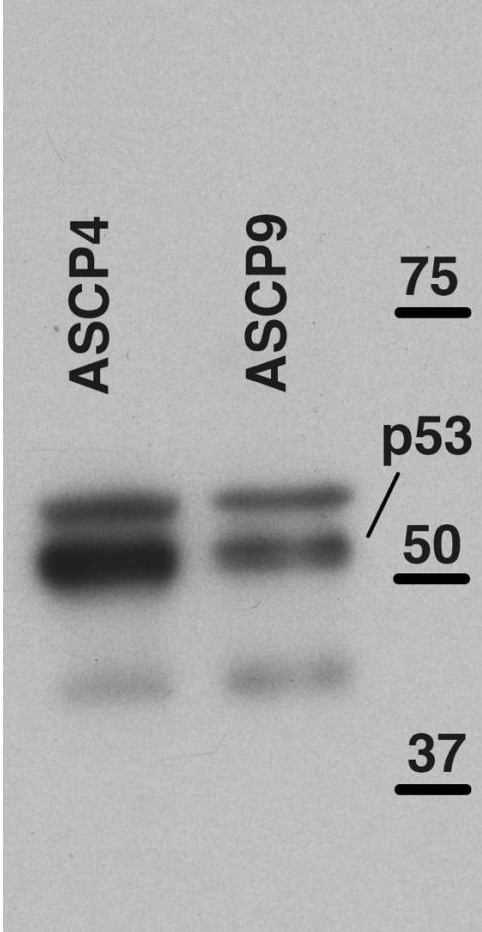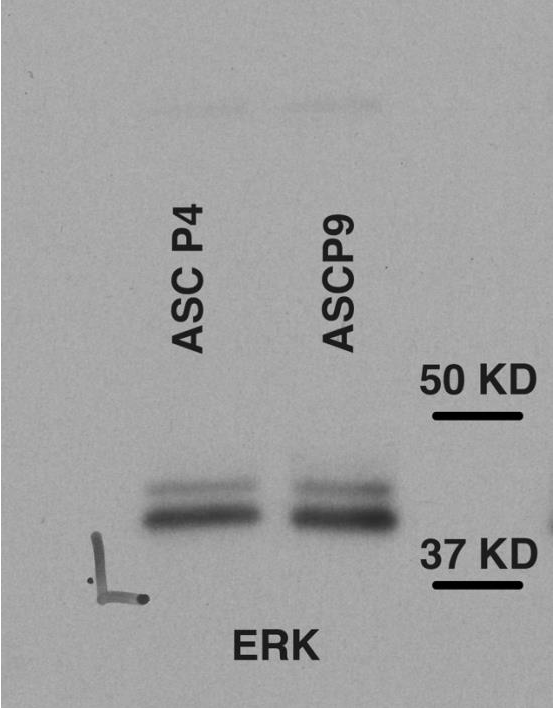

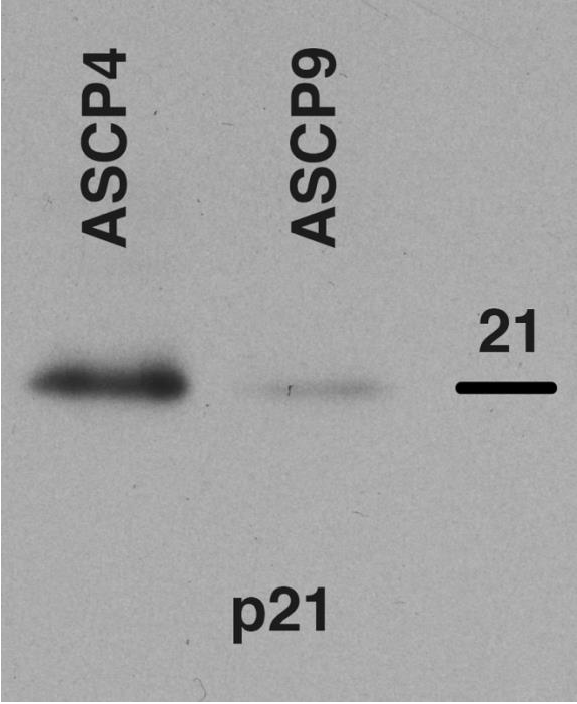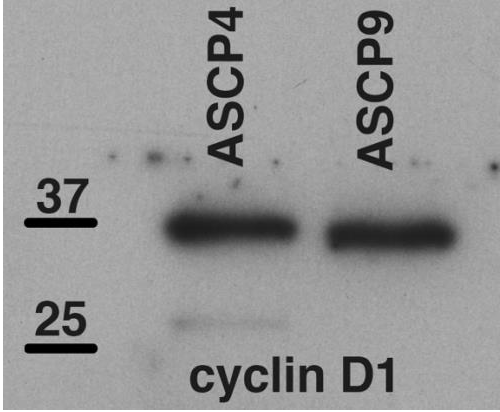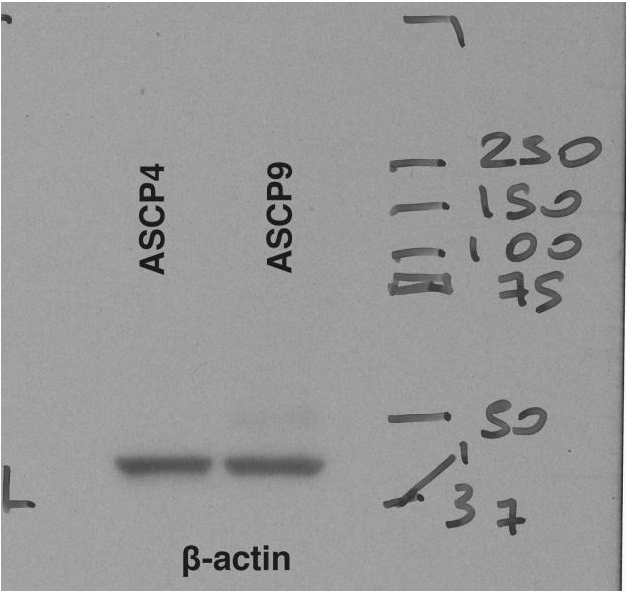

**FIGURE 3**

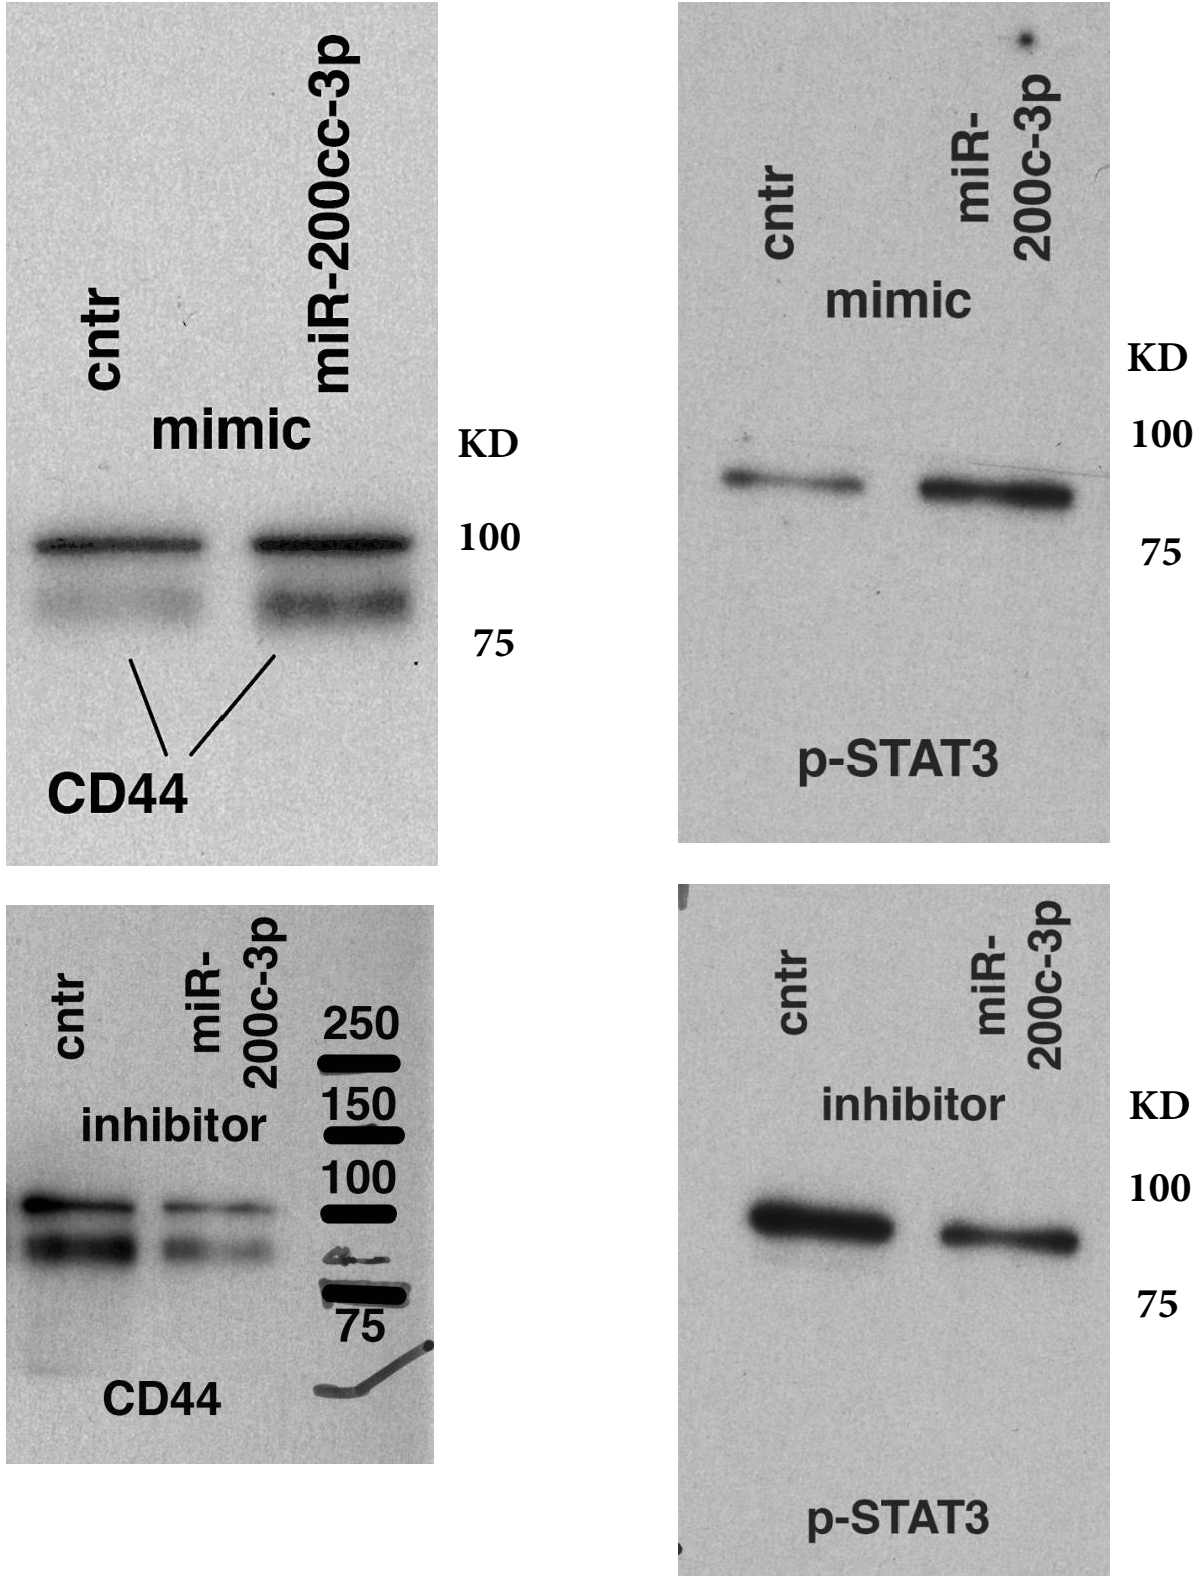

FIGURE 3

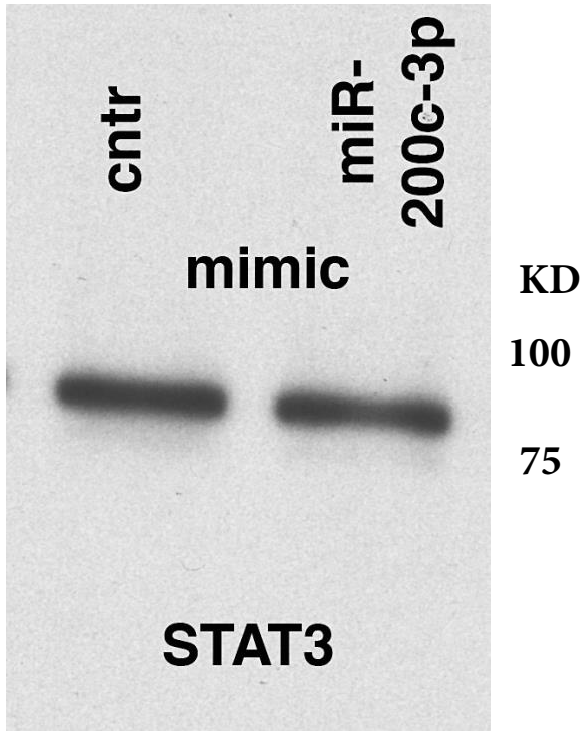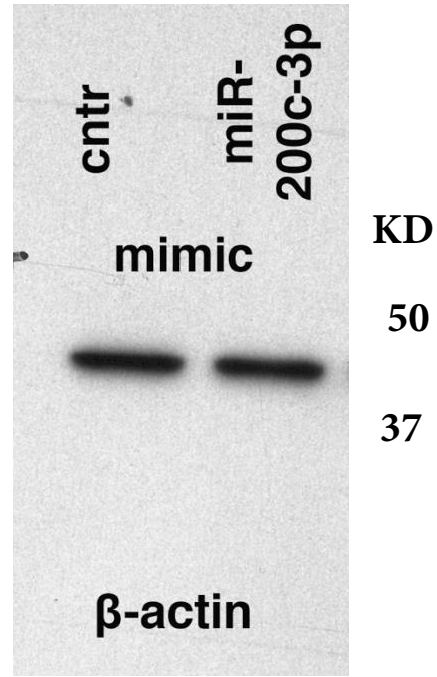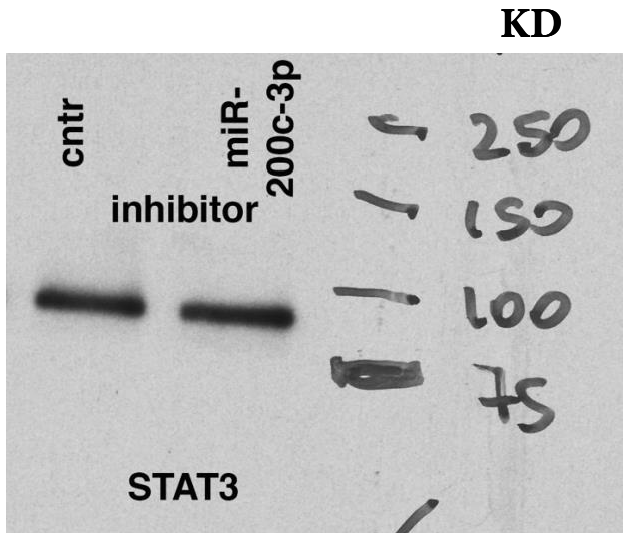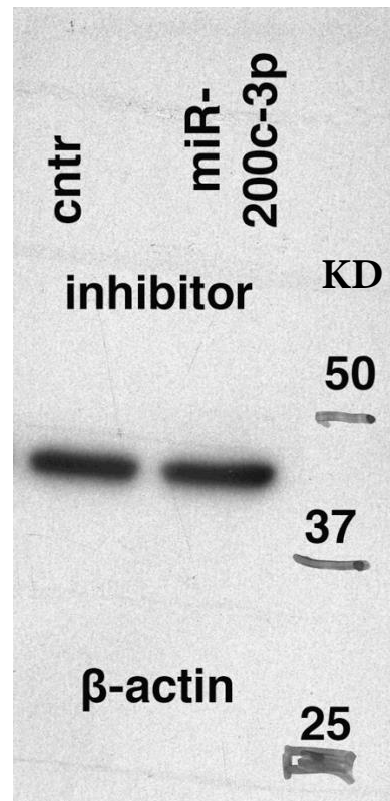



**FIGURE 4**

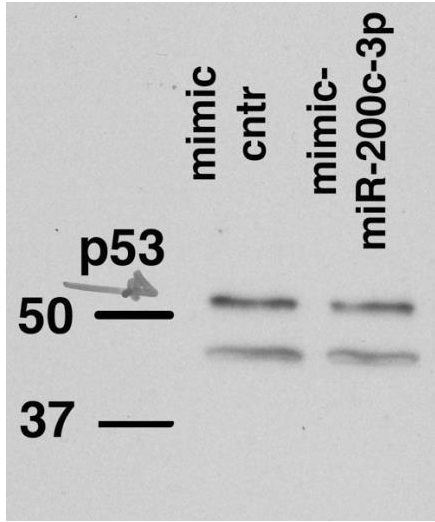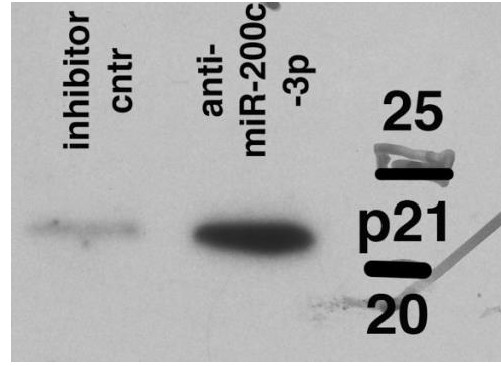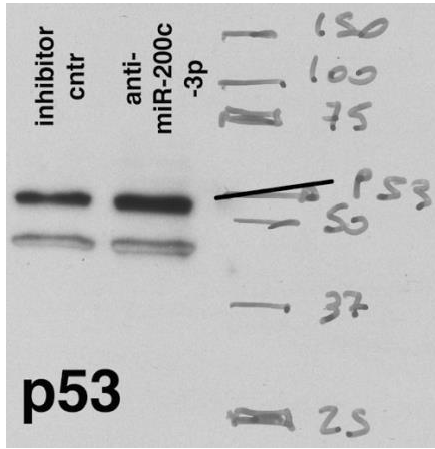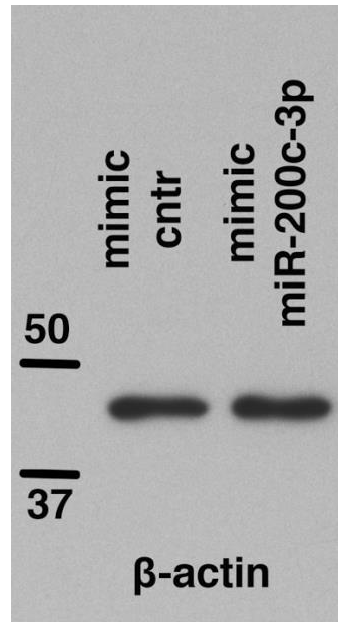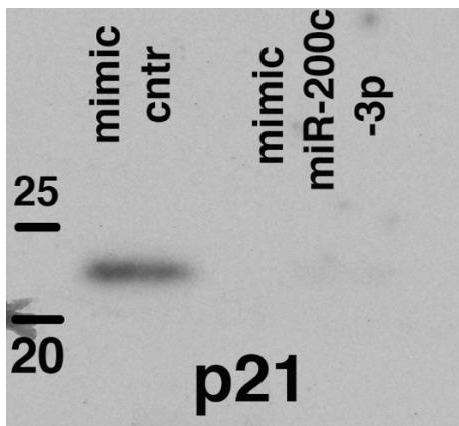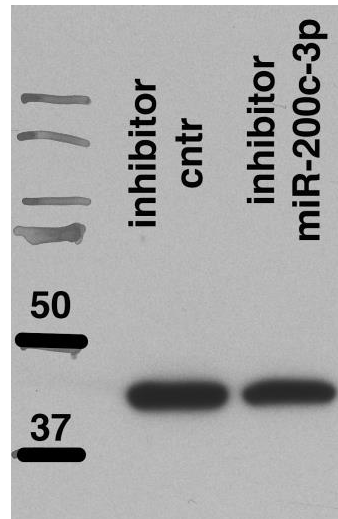

# FIGURE 4

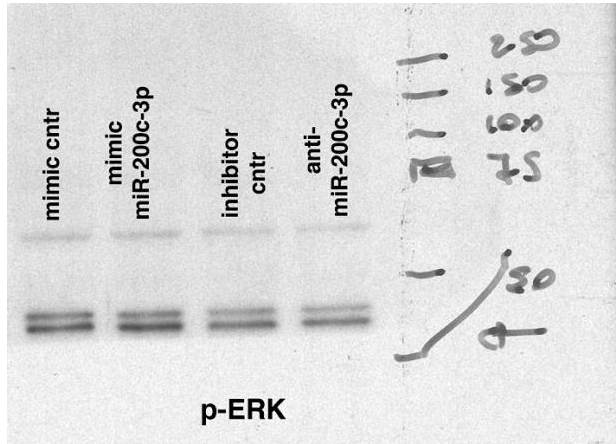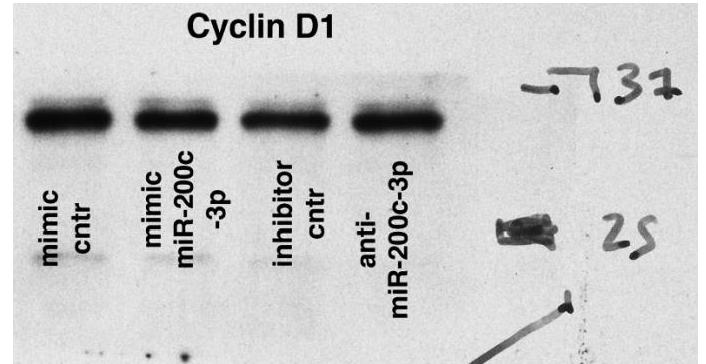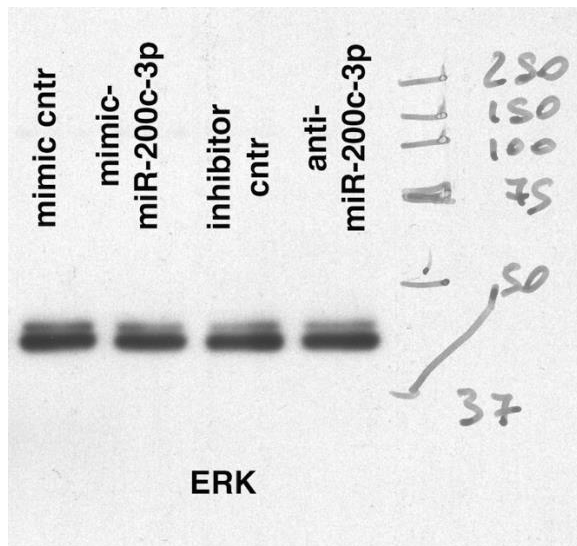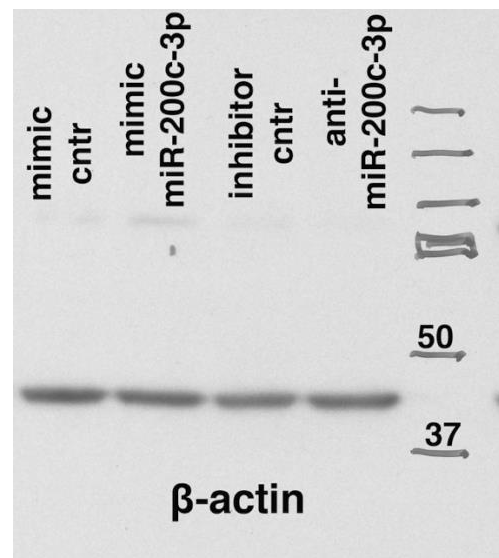

**FIGURE 5**

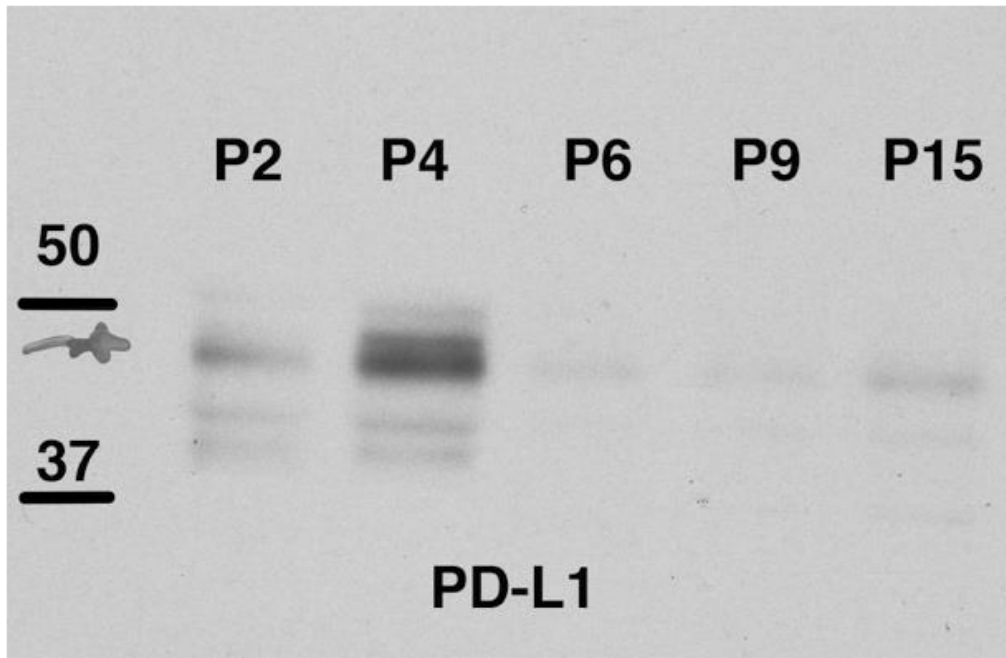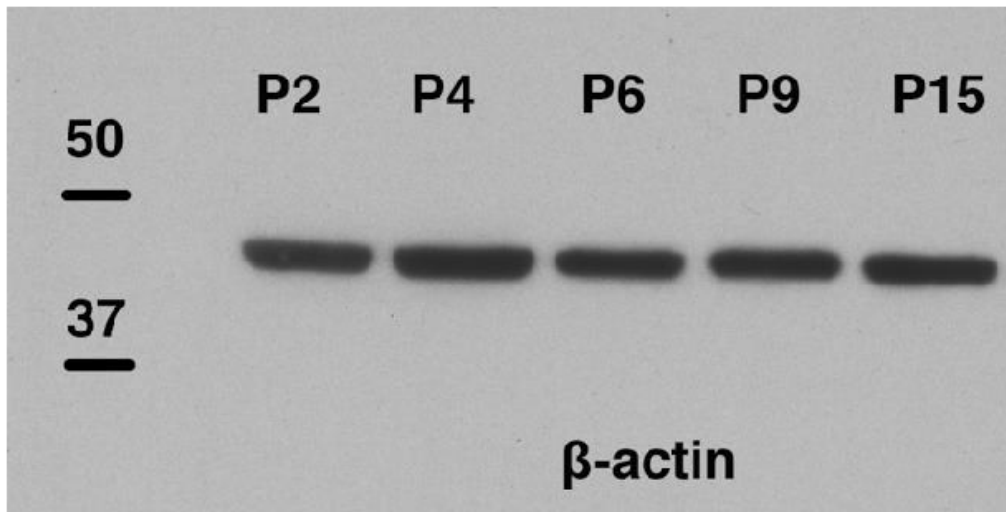

**FIGURE 5**

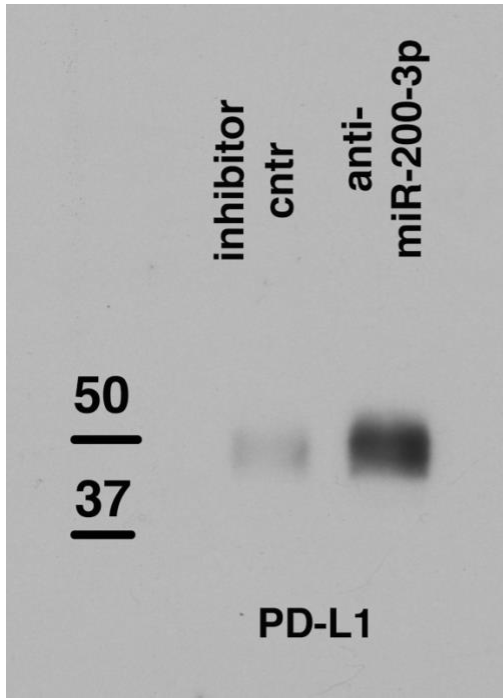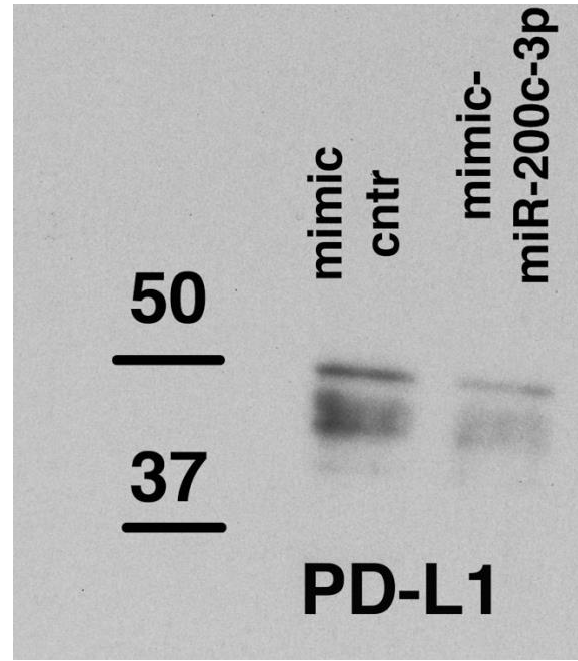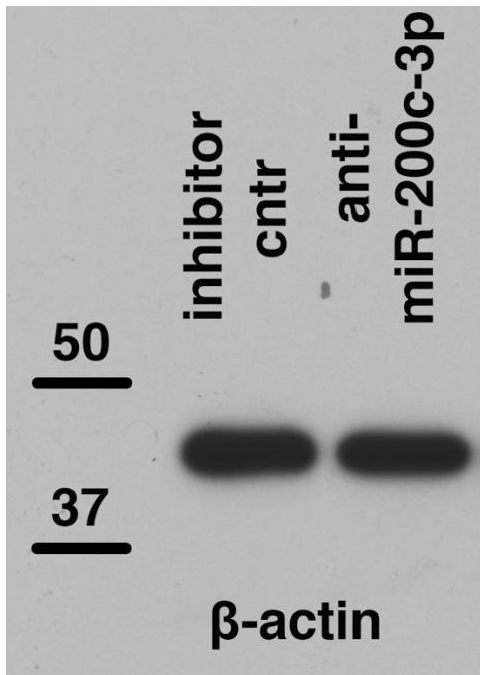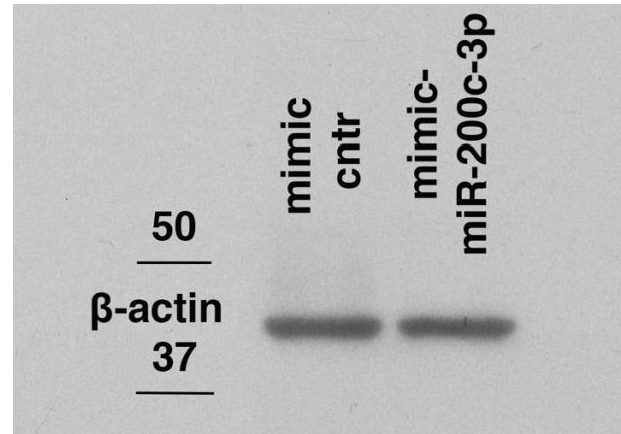

Supplement: pone.0257070.s003.pdf [file pone.0257070.s003.pdf]
